# Supplementary material for: Experiences of children with bronchiectasis and their parents in a novel play-based therapeutic exercise programme: a qualitative analysis
Source: PubMed Central journal article supplement (PMC11293381; doi:10.1136/bmjopen-2023-078994), 2024-07-31
Supplement: bmjopen-14-7-s001.pdf [file bmjopen-14-7-s001.pdf]

Supplemental Table 1: Interview Guide developed for children

| Topic                             | Questions and prompts                                                                                                                                                                                                                                                                                                                                                                                                                                                                                                                                                                                                                                                                                                                                                                                                                                                                                                                                                                                                                                                                                                                                                                                                                                                                                          |
|-----------------------------------|----------------------------------------------------------------------------------------------------------------------------------------------------------------------------------------------------------------------------------------------------------------------------------------------------------------------------------------------------------------------------------------------------------------------------------------------------------------------------------------------------------------------------------------------------------------------------------------------------------------------------------------------------------------------------------------------------------------------------------------------------------------------------------------------------------------------------------------------------------------------------------------------------------------------------------------------------------------------------------------------------------------------------------------------------------------------------------------------------------------------------------------------------------------------------------------------------------------------------------------------------------------------------------------------------------------|
| BREATH exercise program questions | <p>You did the BREATH program at (<i>interest location</i>). You were joined by (<i>insert siblings, friends</i>).</p> <ul style="list-style-type: none"> <li>• Tell me what you thought about the games and activities?               <ul style="list-style-type: none"> <li>○ What did you like about the games/activities? Why?</li> <li>○ What parts did you think were fun?</li> <li>○ What didn't you like about the program? Why?</li> <li>○ What parts did you think were boring?</li> <li>○ What would you change?</li> </ul> </li> <li>• What did you think about how long each session went for?</li> <li>• What did you think about the having the sessions at (<i>insert location</i>)?</li> <li>• What was it like having your (friend/sibling there)?</li> <li>• Have you noticed any changes to the way your body feels or moves since doing the exercise program?               <ul style="list-style-type: none"> <li>○ What are those changes?</li> </ul> </li> <li>• Have you noticed that it is easier or harder to keep up with your friends when you are playing?</li> <li>• Do you get tired when you are playing or running around?               <ul style="list-style-type: none"> <li>○ Did this tiredness change after you did the games/exercise program?</li> </ul> </li> </ul> |
| Home activity program             | <ul style="list-style-type: none"> <li>• What did you think about the home programs?           <ul style="list-style-type: none"> <li>○ What did you like about your home programs?</li> <li>○ What was fun?</li> <li>○ What didn't you like about the home programs?</li> <li>○ What was boring?</li> <li>○ What did you think about the types of activities?</li> <li>○ What did you think about how long your home activities went for?</li> </ul> </li> <li>• What would you change about the home programs?</li> <li>• Who did the home programs with you?           <ul style="list-style-type: none"> <li>○ What was that like?</li> <li>○ How many times a week did you do the home activities?</li> </ul> </li> <li>• Would it be helpful to have an app or other online support?           <ul style="list-style-type: none"> <li>○ What would that look like?</li> </ul> </li> </ul>                                                                                                                                                                                                                                                                                                                                                                                                                |
| Future programs                   | <ul style="list-style-type: none"> <li>• Would you do the games and exercise program again?</li> <li>• Would you recommend that other children do the games/ activity sessions?           <ul style="list-style-type: none"> <li>○ Can you tell my why/why not?</li> </ul> </li> <li>• &gt;10yo: How do you feel an ideal program would be delivered?           <ul style="list-style-type: none"> <li>○ Group sessions, one-on-one, home-based, combination, remote, online coaching, apps</li> </ul> </li> </ul>                                                                                                                                                                                                                                                                                                                                                                                                                                                                                                                                                                                                                                                                                                                                                                                             |

- Would you recommend that friends/siblings be included
- Timing. Before or after school, on the weekends, or in the holidays?
- Frequency. More/less than once a week
- Types of activities
- Setting. At home, in the community, at a health centre.
- <10yo: Would you do the BREATH program again? Would you want to try anything different?
- >10yo: Do you have any thoughts how this would work if we delivered this online via a smart phone or iPad?

Sweeping  
question

Is there anything else you would like to add before we finish?

---

Supplemental Table 2: Interview Guide developed for parents

| Topic                             | Questions and prompts                                                                                                                                                                                                                                                                                                                                                                                                                                                                                                                                                                                                                                                                                                                                                                                                                                                                                                                                                                                                                                                                                                                                                                                                                                                                                                                                                                                                                                                                                                                                                                                                                                                                                                                                                                                                                                                                                                                                                                                                                                                                                             |
|-----------------------------------|-------------------------------------------------------------------------------------------------------------------------------------------------------------------------------------------------------------------------------------------------------------------------------------------------------------------------------------------------------------------------------------------------------------------------------------------------------------------------------------------------------------------------------------------------------------------------------------------------------------------------------------------------------------------------------------------------------------------------------------------------------------------------------------------------------------------------------------------------------------------------------------------------------------------------------------------------------------------------------------------------------------------------------------------------------------------------------------------------------------------------------------------------------------------------------------------------------------------------------------------------------------------------------------------------------------------------------------------------------------------------------------------------------------------------------------------------------------------------------------------------------------------------------------------------------------------------------------------------------------------------------------------------------------------------------------------------------------------------------------------------------------------------------------------------------------------------------------------------------------------------------------------------------------------------------------------------------------------------------------------------------------------------------------------------------------------------------------------------------------------|
| BREATH exercise program questions | <p>Your child participated in the bronchiectasis research project that included games/exercise sessions at (<i>interest location</i>). They were joined by (<i>insert siblings, friends</i>).</p> <ul style="list-style-type: none"> <li>• Tell me what you thought about the BREATH program?               <ul style="list-style-type: none"> <li>○ What did you like about the program?</li> <li>○ What could we have done better?</li> </ul> </li> <li>• What did you think about the types of activities?</li> <li>• What did you think about the length of each session? (<i>approx. 1hr</i>)</li> <li>• What did you think about the length of the whole program? (<i>8 weeks</i>)</li> <li>• What did you think about the location?</li> <li>• How did your child feel about participating in the exercise program?               <ul style="list-style-type: none"> <li>○ What did they like?</li> <li>○ What did they dislike?</li> <li>○ What parts of the sessions did you child find easy?</li> <li>○ What parts of the sessions did your child find hard or difficult?</li> </ul> </li> <li>• Have you noticed any changes in your child’s movement skills or coordination level?               <ul style="list-style-type: none"> <li>○ What type of changes in movement skills or coordination did you observe?</li> <li>○ Did they improve? Did they stay the same? Did they decline?</li> </ul> </li> <li>• Have you noticed any changes in their fitness since participating in the games/exercise sessions?               <ul style="list-style-type: none"> <li>○ Did their fitness improve? Did it stay the same? Did their fitness decline?</li> </ul> </li> <li>• Is there any change to their tiredness or fatigue?               <ul style="list-style-type: none"> <li>○ Do they become more fatigued with physical activity? No change? Less fatigued with physical activity?</li> </ul> </li> <li>• The BREATH program is designed to include siblings, friends or other children with bronchiectasis. Describe how the inclusion of other children influenced your child?</li> </ul> |
| Home activity program             | <ul style="list-style-type: none"> <li>• What did your home program sessions look like?               <ul style="list-style-type: none"> <li>○ Who was usually involved in the home games and activities?</li> <li>○ Did you use any particular strategies to manage the home program (e.g. sibling and parent involvement, supervision, competition, rewards, music)?</li> </ul> </li> <li>• What did you think about the home programs?               <ul style="list-style-type: none"> <li>○ What did you like about the home program?</li> <li>○ What did you dislike about the home program?</li> </ul> </li> </ul>                                                                                                                                                                                                                                                                                                                                                                                                                                                                                                                                                                                                                                                                                                                                                                                                                                                                                                                                                                                                                                                                                                                                                                                                                                                                                                                                                                                                                                                                                         |

- What did you think about the length of each home program?
- What did you think about how often you were asked to do the home program?
- What did you think about the types of activities?
- Was it difficult to motivate you child to do the home program? If so, in what way?
- What did you think about the paper handouts you were provided for the home program?
- How often did you do the home program?

Future programs

- Describe what you think would be an ideal program.
  - Group sessions, one-on-one, home-based, combination, remote, online coaching, apps
  - Timing. Would BREATH be suited closer to the diagnosis of bronchiectasis.
  - Frequency. More/less than once a week
  - Length of program, is 8 weeks, too long, too short or the right about of time?
  - Types of activities
  - Setting. At home, in the community, at a health centre.
  - Timing. Before or after school, on the weekends, or in the holidays?
- Do you have any thoughts how this would work if we delivered over the internet or smart phone app?
- Would a program like BREATH be valuable for other children with bronchiectasis?

Sweeping question

Do you have any other comments you would like to add before we finish?

---

Supplemental Table 3: Codebook to support content analysis of child and parent interview

| <b>Topic</b>                  | <b>Topic Sub Grouping</b>                  | <b>Initial Code</b>             |           |
|-------------------------------|--------------------------------------------|---------------------------------|-----------|
| BREATH Program                | Location                                   | Community                       |           |
|                               |                                            | Home                            |           |
|                               |                                            | Hospital                        |           |
|                               |                                            | Inside                          |           |
|                               |                                            | Other location                  |           |
|                               |                                            | Outside                         |           |
|                               |                                            | Proximity (to home/school)      |           |
|                               |                                            | Research Centre                 |           |
|                               |                                            | School                          |           |
|                               |                                            | Travel time                     |           |
|                               |                                            | Feelings about program          | Adaptable |
|                               |                                            |                                 | Bad       |
|                               | Boring                                     |                                 |           |
|                               | Challenging                                |                                 |           |
|                               | Difficult                                  |                                 |           |
|                               | Dislike                                    |                                 |           |
|                               | Easier                                     |                                 |           |
|                               | Fun / enjoyment                            |                                 |           |
|                               | Games-based                                |                                 |           |
|                               | Good                                       |                                 |           |
|                               | Happy                                      |                                 |           |
|                               | Hard or harder                             |                                 |           |
|                               | Helpful                                    |                                 |           |
|                               | Improve                                    |                                 |           |
|                               | Individualised                             |                                 |           |
|                               | Interesting                                |                                 |           |
|                               | Like                                       |                                 |           |
|                               | Play- based                                |                                 |           |
|                               | Rapport (therapist, or others at sessions) |                                 |           |
|                               | Social / socialise                         |                                 |           |
|                               | Structured                                 |                                 |           |
|                               | Variety                                    |                                 |           |
|                               | Logistics                                  | Communication therapist         |           |
|                               |                                            | Communication written           |           |
|                               |                                            | Equipment support               |           |
|                               | Support People                             | Organisation                    |           |
|                               |                                            | Child                           |           |
|                               |                                            | Friend                          |           |
|                               |                                            | Parent                          |           |
|                               |                                            | Sibling                         |           |
|                               |                                            | Therapist                       |           |
|                               | Timing of diagnosis                        | Other people (not listed above) |           |
| Appropriate as was            |                                            |                                 |           |
| Prefer closer to diagnosis    |                                            |                                 |           |
| Prefer further from diagnosis |                                            |                                 |           |

|                                  |                                |                                                                                                                                                                                                                                                                                           |
|----------------------------------|--------------------------------|-------------------------------------------------------------------------------------------------------------------------------------------------------------------------------------------------------------------------------------------------------------------------------------------|
| Changes in participant           | Symptoms                       | Breathless<br>Coughing<br>Tired / fatigue / exhausted                                                                                                                                                                                                                                     |
|                                  | Other changes                  | Ability<br>Confidence<br>Co-ordination<br>Fitness<br>Motivation<br>No change<br>Participation<br>Reducing Medicine<br>Skills- balance<br>Skills- ball<br>Skills- exercise (and activities)<br>Skills- jumping<br>Skills- Play<br>Skills- running<br>Skills- throwing<br>Tried (or trying) |
| Duration and Frequency<br>BREATH | Frequency F2F Sessions         | Appropriate as was<br>Prefer more frequent<br>Prefer less frequent                                                                                                                                                                                                                        |
|                                  | Duration of F2F sessions       | Appropriate as was<br>Prefer longer<br>Prefer shorter                                                                                                                                                                                                                                     |
|                                  | Duration of BREATH program     | Appropriate as was<br>Prefer longer<br>Prefer shorter                                                                                                                                                                                                                                     |
| Home program                     | Frequency of home sessions     | Appropriate as was<br>Prefer more frequent<br>Prefer less frequent                                                                                                                                                                                                                        |
|                                  | Duration of home sessions      | Appropriate as was<br>Prefer longer<br>Prefer shorter                                                                                                                                                                                                                                     |
|                                  | Management of home program     | Competition<br>Equipment<br>Parent involvement<br>Reminders<br>Rewards<br>Sibling involvement<br>Supervision                                                                                                                                                                              |
|                                  | Sentiment towards home program | Bad<br>Boring<br>Challenging<br>Child autonomy<br>Difficult                                                                                                                                                                                                                               |

|                 |                     |                                             |
|-----------------|---------------------|---------------------------------------------|
|                 |                     | Dislike                                     |
|                 |                     | Easier                                      |
|                 |                     | Fun                                         |
|                 |                     | Games-based                                 |
|                 |                     | Good                                        |
|                 |                     | Happy                                       |
|                 |                     | Hard or harder                              |
|                 |                     | Helpful                                     |
|                 |                     | Improve                                     |
|                 |                     | Interesting                                 |
|                 |                     | Like                                        |
| Future Programs | Mode                | Face to face                                |
|                 |                     | Group based                                 |
|                 |                     | Individual with therapist                   |
|                 |                     | Using tech (like an APP) for games sessions |
|                 |                     | Using tech (like an APP) for home program   |
|                 | Time /timing        | Afternoon                                   |
|                 |                     | Day                                         |
|                 |                     | Evening                                     |
|                 |                     | Holidays                                    |
|                 |                     | Morning                                     |
|                 |                     | School Term                                 |
|                 |                     | Weekend                                     |
|                 | Recommend to others | Comment                                     |

---
